# Supplementary material for: Myocardial Work Index in Professional Football Players: A Novel Method for Assessment of Cardiac Adaptation
Source: MDPI journal article supplement (doi:10.3390/jcm12093059), 2023-04-23
Supplement: s1 [file s1]

**Supplementary Table S1. Demographic and echocardiographic characteristics depending on the position in the field.**

|                                              | <b>Goalkeeper and<br/>Defense<br/>(N = 19)</b> |       | <b>Midfielder<br/>(N = 16)</b> |       | <b>Striker<br/>(N = 13)</b> |       | <b>p-value</b> |
|----------------------------------------------|------------------------------------------------|-------|--------------------------------|-------|-----------------------------|-------|----------------|
|                                              | Mean                                           | SD    | Mean                           | SD    | Mean                        | SD    |                |
| Age (years)                                  | 27.05                                          | 4.02  | 28.00                          | 4.32  | 24.69                       | 5.22  | 0.145          |
| Height (m)                                   | 1.80                                           | 0.09  | 1.76                           | 0.08  | 1.76                        | 0.11  | 0.466          |
| Weight (Kg)                                  | 73.44                                          | 11.06 | 70.33                          | 7.28  | 71.61                       | 9.58  | 0.739          |
| BMI (Kg/m <sup>2</sup> )                     | 22.59                                          | 1.50  | 22.74                          | 1.26  | 23.03                       | 1.43  | 0.725          |
| SBP (mmHg)                                   | 118.89                                         | 11.64 | 111.25                         | 11.01 | 118.77                      | 8.33  | 0.037          |
| DBP (mmHg)                                   | 74.37                                          | 8.18  | 71.88                          | 10.40 | 73.23                       | 10.83 | 0.715          |
| HR (bpm)                                     | 57.06                                          | 7.84  | 56.44                          | 11.18 | 58.31                       | 7.95  | 0.761          |
| <b>Standard echocardiographic parameters</b> |                                                |       |                                |       |                             |       |                |
| LVIDd (mm)                                   | 51.37                                          | 2.91  | 51.06                          | 3.57  | 51.54                       | 3.71  | 0.890          |
| IVSTd (mm)                                   | 8.00                                           | 1.33  | 8.25                           | 1.18  | 7.92                        | 2.14  | 0.654          |
| PWTd (mm)                                    | 7.63                                           | 1.12  | 7.50                           | 1.41  | 7.54                        | 1.13  | 0.988          |
| RWT                                          | 0.31                                           | 0.05  | 0.33                           | 0.06  | 0.31                        | 0.09  | 0.805          |
| GLS VI (%)                                   | -19.14                                         | 2.34  | -19.31                         | 2.38  | -18.67                      | 2.46  | 0.754          |
| LV mass indexed (g/m <sup>2</sup> )          | 69.43                                          | 14.79 | 60.47                          | 8.66  | 65.58                       | 17.67 | 0.211          |
| LVEDV 2D (ml)                                | 123.95                                         | 24.46 | 125.88                         | 19.46 | 130.23                      | 16.02 | 0.743          |
| LVESV 2D (ml)                                | 49.74                                          | 14.68 | 43.94                          | 10.77 | 51.38                       | 14.12 | 0.320          |
| LVEF 2D (%)                                  | 63.68                                          | 5.94  | 65.44                          | 6.78  | 62.62                       | 5.80  | 0.556          |
| E (cm/s)                                     | 61.72                                          | 29.77 | 62.42                          | 28.47 | 70.70                       | 27.11 | 0.502          |
| EA (ratio)                                   | 1.95                                           | 0.55  | 1.93                           | 0.39  | 2.05                        | 0.63  | 0.755          |
| Lateral E' (cm/s)                            | 12.08                                          | 6.12  | 15.11                          | 5.81  | 13.83                       | 5.87  | 0.215          |
| Medial E' (cm/s)                             | 12.38                                          | 2.71  | 13.81                          | 2.76  | 11.64                       | 3.17  | 0.193          |
| Lateral E/É                                  | 6.05                                           | 3.35  | 4.90                           | 2.54  | 5.94                        | 2.58  | 0.143          |
| Medial E/É                                   | 5.67                                           | 1.83  | 5.18                           | 1.09  | 5.57                        | 1.58  | 0.863          |
| TAPSE (mm)                                   | 24.18                                          | 3.72  | 25.25                          | 3.86  | 23.92                       | 2.40  | 0.557          |
| Tricuspid DTI Systolic Velocity (cm/s)       | 13.61                                          | 1.88  | 13.12                          | 1.27  | 13.01                       | 1.89  | 0.687          |
| Shortening fraction (%)                      | 52.00                                          | 7.62  | 52.38                          | 6.13  | 55.58                       | 5.45  | 0.368          |
| LAV (ml/m <sup>2</sup> )                     | 23.81                                          | 7.84  | 23.47                          | 6.73  | 26.39                       | 8.66  | 0.491          |
| <b>Advanced echocardiographic parameters</b> |                                                |       |                                |       |                             |       |                |
| LVEDV 4D (ml)                                | 150.44                                         | 24.29 | 146.88                         | 29.63 | 148.67                      | 25.14 | 0.944          |

|                             |         |        |         |        |         |        |       |
|-----------------------------|---------|--------|---------|--------|---------|--------|-------|
| LVESV 4D (ml)               | 59.33   | 10.84  | 55.88   | 13.25  | 59.08   | 12.99  | 0.657 |
| LVEF 4D (%)                 | 60.15   | 3.21   | 60.75   | 3.36   | 58.42   | 2.57   | 0.122 |
| LVSV 4D (ml)                | 94.38   | 12.45  | 89.13   | 18.31  | 84.34   | 17.48  | 0.215 |
| LVCO 4D (l/m <sup>2</sup> ) | 4.69    | 1.01   | 4.41    | 0.81   | 4.55    | 0.68   | 0.561 |
| RVEDV 4D (ml)               | 116.56  | 27.61  | 109.75  | 19.68  | 108.45  | 21.25  | 0.648 |
| RVESV 4D (ml)               | 49.88   | 11.90  | 47.38   | 11.18  | 45.73   | 10.56  | 0.641 |
| RVEF 4D (%)                 | 58.19   | 4.71   | 56.88   | 4.71   | 58.05   | 3.40   | 0.753 |
| RVSV 4D (ml)                | 69.38   | 25.01  | 62.50   | 11.14  | 63.73   | 13.94  | 0.888 |
| <b>Myocardial Work</b>      |         |        |         |        |         |        |       |
| GWI (mmHg%)                 | 1806.16 | 198.88 | 1774.44 | 310.70 | 1748.67 | 278.63 | 0.645 |
| GCW (mmHg%)                 | 2043.37 | 230.59 | 2038.13 | 328.49 | 1985.42 | 297.63 | 0.569 |
| GWV (mmHg%)                 | 62.11   | 24.84  | 59.75   | 24.66  | 53.67   | 26.28  | 0.457 |
| GWE (mmHg%)                 | 96.42   | 1.22   | 96.63   | 1.36   | 96.67   | 1.50   | 0.506 |

**Abbreviations.** BMI: Body Mass Index, SBP: Systolic Blood Pressure, DBP: Diastolic Blood Pressure, HR: Heart Rate, LVIDd: Left ventricular internal diastolic diameter, IVSTd: diastolic interventricular septal thickness, PWT: diastolic posterior wall thickness, RWT: relative Wall thickness, LVEDV: Left ventricular end-diastolic volume, LVESV: Left end-systolic volume, LVEF: Left ventricular ejection fraction, LVCO: Left ventricular cardiac output, LVSV: Left ventricular stroke volume, LAV: Left atrial volume, GLS: global longitudinal strain, RVEDV: Right ventricular end-diastolic volume, RVESV: Right ventricular end-systolic volume, RVSV: Right ventricular stroke volume, GWI: Global myocardial work index, GCW: Global constructive work, GWE: Global Myocardial work efficiency, GWV: Global Wasted work.

**Supplementary Table S2. Demographic and echocardiographic characteristics depending on the number of cardiac alterations.**

|                                              | <b>Without alterations</b><br>(N = 8) |       | <b>1 alteration</b><br>(N = 21) |       | <b>2 or more alterations</b><br>(N = 20) |       | <b>p-value</b> |
|----------------------------------------------|---------------------------------------|-------|---------------------------------|-------|------------------------------------------|-------|----------------|
|                                              | Mean                                  | SD    | Mean                            | SD    | Mean                                     | SD    |                |
| Age (years)                                  | 24.88                                 | 4.52  | 25.19                           | 4.18  | 29.70                                    | 4.50  | 0.004          |
| Height (m)                                   | 1.72                                  | 0.13  | 1.77                            | 0.08  | 1.80                                     | 0.08  | 0.321          |
| Weight (Kg)                                  | 67.31                                 | 8.92  | 71.87                           | 9.48  | 73.64                                    | 9.20  | 0.489          |
| BMI (Kg/m <sup>2</sup> )                     | 22.79                                 | 1.78  | 22.74                           | 1.28  | 22.76                                    | 1.35  | 0.676          |
| SBP (mmHg)                                   | 108.38                                | 9.16  | 117.76                          | 11.08 | 120.60                                   | 15.43 | 0.497          |
| DBP (mmHg)                                   | 64.13                                 | 4.91  | 72.62                           | 8.35  | 78.70                                    | 10.32 | 0.151          |
| HR (bpm)                                     | 54.00                                 | 9.86  | 57.75                           | 10.54 | 57.65                                    | 6.68  | 0.892          |
| <b>Standard echocardiographic parameters</b> |                                       |       |                                 |       |                                          |       |                |
| LVIDd (mm)                                   | 51.50                                 | 3.93  | 51.33                           | 3.37  | 51.15                                    | 3.05  | 0.990          |
| IVSTd (mm)                                   | 7.25                                  | 1.16  | 7.90                            | 1.37  | 8.60                                     | 1.64  | 0.150          |
| PWTd (mm)                                    | 7.88                                  | 1.55  | 7.48                            | 1.17  | 7.50                                     | 1.10  | 0.967          |
| RWT                                          | 0.28                                  | 0.05  | 0.31                            | 0.07  | 0.34                                     | 0.06  | 0.192          |
| GLS VI (%)                                   | -18.88                                | 2.17  | -18.48                          | 2.38  | -19.72                                   | 2.31  | 0.079          |
| LV mass indexed (g/m <sup>2</sup> )          | 65.40                                 | 10.26 | 64.94                           | 12.75 | 65.00                                    | 16.49 | 0.485          |
| LVEDV 2D (ml)                                | 125.13                                | 23.90 | 130.95                          | 15.85 | 122.25                                   | 23.04 | 0.611          |
| LVESV 2D (ml)                                | 42.63                                 | 11.81 | 51.14                           | 13.42 | 48.90                                    | 15.03 | 0.629          |
| LVEF 2D (%)                                  | 65.25                                 | 7.48  | 63.10                           | 5.63  | 64.05                                    | 6.42  | 0.565          |
| E (cm/s)                                     | 63.10                                 | 28.51 | 74.50                           | 15.27 | 53.23                                    | 34.65 | 0.070          |
| EA (ratio)                                   | 2.15                                  | 0.43  | 1.91                            | 0.49  | 1.94                                     | 0.56  | 0.910          |
| Lateral E' (cm/s)                            | 14.89                                 | 6.39  | 15.19                           | 4.29  | 11.14                                    | 6.79  | 0.065          |
| Medial E' (cm/s)                             | 11.88                                 | 1.46  | 13.14                           | 2.84  | 12.42                                    | 3.55  | 0.382          |
| Lateral E/É                                  | 4.61                                  | 1.18  | 5.35                            | 2.30  | 6.33                                     | 3.75  | 0.809          |
| Medial E/É                                   | 5.37                                  | 1.05  | 5.20                            | 1.12  | 5.79                                     | 1.87  | 0.371          |
| TAPSE (mm)                                   | 25.50                                 | 4.41  | 23.07                           | 3.11  | 25.45                                    | 2.91  | 0.013          |
| Tricuspid DTI Systolic Velocity (cm/s)       | 12.82                                 | 1.10  | 13.62                           | 1.39  | 13.13                                    | 2.17  | 0.709          |
| Shortening fraction (%)                      | 54.67                                 | 5.51  | 54.23                           | 5.88  | 50.89                                    | 7.61  | 0.156          |
| LAV (ml/m <sup>2</sup> )                     | 28.84                                 | 10.04 | 22.31                           | 6.55  | 24.71                                    | 7.24  | 0.221          |
| <b>Advanced echocardiographic parameters</b> |                                       |       |                                 |       |                                          |       |                |
| LVEDV 4D (ml)                                | 150.57                                | 39.58 | 147.80                          | 23.62 | 149.05                                   | 23.82 | 0.613          |

|                             |         |        |         |        |         |        |       |
|-----------------------------|---------|--------|---------|--------|---------|--------|-------|
| LVESV 4D (ml)               | 57.29   | 16.35  | 57.45   | 11.55  | 59.00   | 11.64  | 0.527 |
| LVEF 4D (%)                 | 62.14   | 3.29   | 60.10   | 3.14   | 58.88   | 2.86   | 0.193 |
| LVSV 4D (ml)                | 89.71   | 28.36  | 89.63   | 14.30  | 89.84   | 13.07  | 0.648 |
| LVCO 4D (l/m <sup>2</sup> ) | 4.36    | 0.94   | 4.68    | 1.01   | 4.50    | 0.65   | 0.955 |
| RVEDV 4D (ml)               | 106.29  | 25.99  | 104.05  | 21.74  | 124.31  | 18.91  | 0.007 |
| RVESV 4D (ml)               | 46.00   | 11.87  | 44.55   | 12.02  | 52.88   | 8.16   | 0.010 |
| RVEF 4D (%)                 | 56.24   | 3.32   | 58.29   | 4.63   | 57.51   | 4.48   | 0.518 |
| RVSV 4D (ml)                | 60.29   | 15.29  | 60.15   | 13.43  | 74.13   | 21.33  | 0.032 |
| <b>Myocardial Work</b>      |         |        |         |        |         |        |       |
| GWI (mmHg%)                 | 1679.75 | 220.65 | 1746.19 | 266.75 | 1891.79 | 265.60 | 0.148 |
| GCW (mmHg%)                 | 1910.25 | 214.18 | 1991.52 | 278.02 | 2149.26 | 309.05 | 0.088 |
| GWV (mmHg%)                 | 45.25   | 9.72   | 67.14   | 27.59  | 57.32   | 23.57  | 0.074 |
| GWE (mmHg%)                 | 97.13   | 0.35   | 96.19   | 1.54   | 96.74   | 1.19   | 0.297 |

**Abbreviations.** BMI: Body Mass Index, SBP: Systolic Blood Pressure, DBP: Diastolic Blood Pressure, HR: Heart Rate, LVIDd: Left ventricular internal diastolic diameter, IVSTd: diastolic interventricular septal thickness, PWT: diastolic posterior wall thickness, RWT: relative Wall thickness, LVEDV: Left ventricular end-diastolic volume, LVESV: Left end-systolic volume, LVEF: Left ventricular ejection fraction, LVCO: Left ventricular cardiac output, LVSV: Left ventricular stroke volume, LAV: Left atrial volume, GLS: global longitudinal strain, RVEDV: Right ventricular end-diastolic volume, RVESV: Right ventricular end-systolic volume, RVSV: Right ventricular stroke volume, GWI: Global myocardial work index, GCW: Global constructive work, GWE: Global Myocardial work efficiency, GWV: Global Wasted work.

**Supplementary Table S3. Correlation matrix of the variables referring to MW and those referring to standard echocardiographic and advanced echocardiographic in amateur athletes and professional soccer players.**

| <b>PROFESSIONAL FOOTBALL PLAYERS</b>         |             |         |             |         |             |         |             |         |
|----------------------------------------------|-------------|---------|-------------|---------|-------------|---------|-------------|---------|
| Age (years)                                  | 0.205       | 0.163   | 0.209       | 0.155   | 0.285       | 0.049   | -0.223      | 0.128   |
| SBP (mmHg)                                   | 0.503       | 0.000   | 0.467       | 0.001   | 0.205       | 0.162   | -0.190      | 0.196   |
| DBP (mmHg)                                   | 0.208       | 0.156   | 0.271       | 0.063   | 0.422       | 0.003   | -0.314      | 0.030   |
| HR (bpm)                                     | -0.258      | 0.080   | -0.195      | 0.189   | 0.155       | 0.299   | -0.182      | 0.221   |
| <b>Standard echocardiographic parameters</b> |             |         |             |         |             |         |             |         |
| LVESV 2D (ml)                                | -0.078      | 0.600   | -0.050      | 0.738   | 0.277       | 0.057   | -0.281      | 0.053   |
| LVEF 2D (%)                                  | 0.136       | 0.356   | 0.152       | 0.303   | -0.226      | 0.122   | 0.275       | 0.058   |
| EA                                           | 0.142       | 0.345   | 0.131       | 0.386   | -0.191      | 0.203   | 0.300       | 0.043   |
| TAPSE (mm)                                   | 0.352       | 0.014   | 0.328       | 0.023   | -0.187      | 0.203   | 0.276       | 0.058   |
| Shortening fraction (%)                      | -0.305      | 0.047   | -0.326      | 0.033   | 0.031       | 0.845   | 0.028       | 0.857   |
| LAV (ml/m <sup>2</sup> )                     | 0.381       | 0.009   | 0.370       | 0.011   | -0.279      | 0.061   | 0.345       | 0.019   |
| GLS VI (%)                                   | -0.654      | 0.000   | -0.687      | 0.000   | 0.249       | 0.088   | -0.437      | 0.002   |
| <b>Advanced echocardiographic parameters</b> |             |         |             |         |             |         |             |         |
| LVSV 4D (ml)                                 | 0.293       | 0.056   | 0.214       | 0.169   | -0.100      | 0.524   | 0.142       | 0.364   |
| RVEDV 4D (ml)                                | 0.401       | 0.008   | 0.466       | 0.002   | -0.094      | 0.549   | 0.159       | 0.307   |
| RVESV 4D (ml)                                | 0.366       | 0.016   | 0.453       | 0.002   | -0.035      | 0.824   | 0.111       | 0.479   |
| RVSV 4D (ml)                                 | 0.347       | 0.023   | 0.365       | 0.016   | -0.118      | 0.451   | 0.174       | 0.265   |
| <b>CONTROLS</b>                              |             |         |             |         |             |         |             |         |
|                                              | <b>GWI</b>  |         | <b>GCW</b>  |         | <b>GWW</b>  |         | <b>GWE</b>  |         |
|                                              | Coefficient | p-value | Coefficient | p-value | Coefficient | p-value | Coefficient | p-value |
| BMI (Kg/m <sup>2</sup> )                     | 0.270       | 0.064   | 0.173       | 0.239   | 0.154       | 0.297   | 0.007       | 0.962   |
| SBP (mmHg)                                   | 0.259       | 0.076   | 0.215       | 0.142   | 0.412       | 0.004   | -0.254      | 0.082   |
| DBP (mmHg)                                   | 0.164       | 0.264   | 0.134       | 0.365   | 0.394       | 0.006   | -0.264      | 0.069   |
| HR (bpm)                                     | 0.001       | 0.997   | 0.059       | 0.840   | 0.280       | 0.332   | -0.204      | 0.485   |
| <b>Standard echocardiographic parameters</b> |             |         |             |         |             |         |             |         |
| RWT                                          | -0.003      | 0.983   | -0.050      | 0.733   | 0.223       | 0.128   | -0.253      | 0.083   |
| E (cm/sg)                                    | 0.352       | 0.028   | 0.325       | 0.044   | -0.013      | 0.936   | 0.194       | 0.236   |
| Medial E/É                                   | 0.369       | 0.063   | 0.333       | 0.096   | 0.104       | 0.614   | 0.069       | 0.739   |
| Tricuspid DTI Systolic Velocity (cm/sg)      | 0.405       | 0.055   | 0.309       | 0.152   | -0.326      | 0.129   | 0.431       | 0.040   |
| GLS VI (%)                                   | -0.595      | 0.000   | -0.613      | 0.000   | 0.403       | 0.005   | -0.534      | 0.000   |

| Advanced echocardiographic parameters |        |       |        |       |       |       |        |       |
|---------------------------------------|--------|-------|--------|-------|-------|-------|--------|-------|
| LVSV 4D (ml)                          | -0.295 | 0.172 | -0.363 | 0.089 | 0.070 | 0.752 | -0.087 | 0.694 |

**Abbreviations.** BMI: Body Mass Index, SBP: Systolic Blood Pressure, DBP: Diastolic Blood Pressure, HR: Heart Rate, LVIDd: Left ventricular internal diastolic diameter, IVSTd: diastolic interventricular septal thickness, PWT: diastolic posterior wall thickness, RWT: relative Wall thickness, LVEDV: Left ventricular end-diastolic volume, LVESV: Left end-systolic volume, LVEF: Left ventricular ejection fraction, LVCO: Left ventricular cardiac output, LVSV: Left ventricular stroke volume, LAV: Left atrial volume, GLS: global longitudinal strain, RVEDV: Right ventricular end-diastolic volume, RVESV: Right ventricular end-systolic volume, GWI: Global myocardial work index, GCW: Global constructive work, GWE: Global Myocardial work efficiency, GWW: Global Wasted work.

**Supplementary Table S4. Prevalence of the different types of regurgitation in professional football players and controls.**

|                                      | Mitral Regurgitation |      | Tricuspid Regurgitation |      | Pulmonary Regurgitation |      | Aortic Regurgitation |     | Any Regurgitation |      |
|--------------------------------------|----------------------|------|-------------------------|------|-------------------------|------|----------------------|-----|-------------------|------|
|                                      | N                    | %    | N                       | %    | N                       | %    | N                    | %   | N                 | %    |
| <b>Professional Football Players</b> | 8                    | 16.3 | 17                      | 34.7 | 13                      | 26.5 | 1                    | 2.0 | 25                | 51.0 |
| <b>Controls</b>                      | 3                    | 6.3  | 0                       | 0.0  | 0                       | 0.0  | 0                    | 0.0 | 3                 | 6.3  |
| <b>p-value</b>                       | 0.118                |      | <0.001                  |      | <0.001                  |      | 0.320                |     | <0.001            |      |
